# Supplementary material for: Cognitive impairments in a Down syndrome model with abnormal hippocampal and prefrontal dynamics and cytoarchitecture
Source: PubMed Central journal article supplement (PMC9929862; doi:10.1016/j.isci.2023.106073), 2023-01-28
Supplement: mmc1.pdf [file mmc1.pdf]

**Supplemental information**

**Cognitive impairments in a Down syndrome  
model with abnormal hippocampal  
and prefrontal dynamics and cytoarchitecture**

**Phillip M. Muza, Daniel Bush, Marta Pérez-González, Ines Zouhair, Karen  
Cleverley, Miriam L. Sopena, Rifdat Aoidi, Steven J. West, Mark Good, Victor L.J.  
Tybulewicz, Matthew C. Walker, Elizabeth M.C. Fisher, and Pishan Chang**

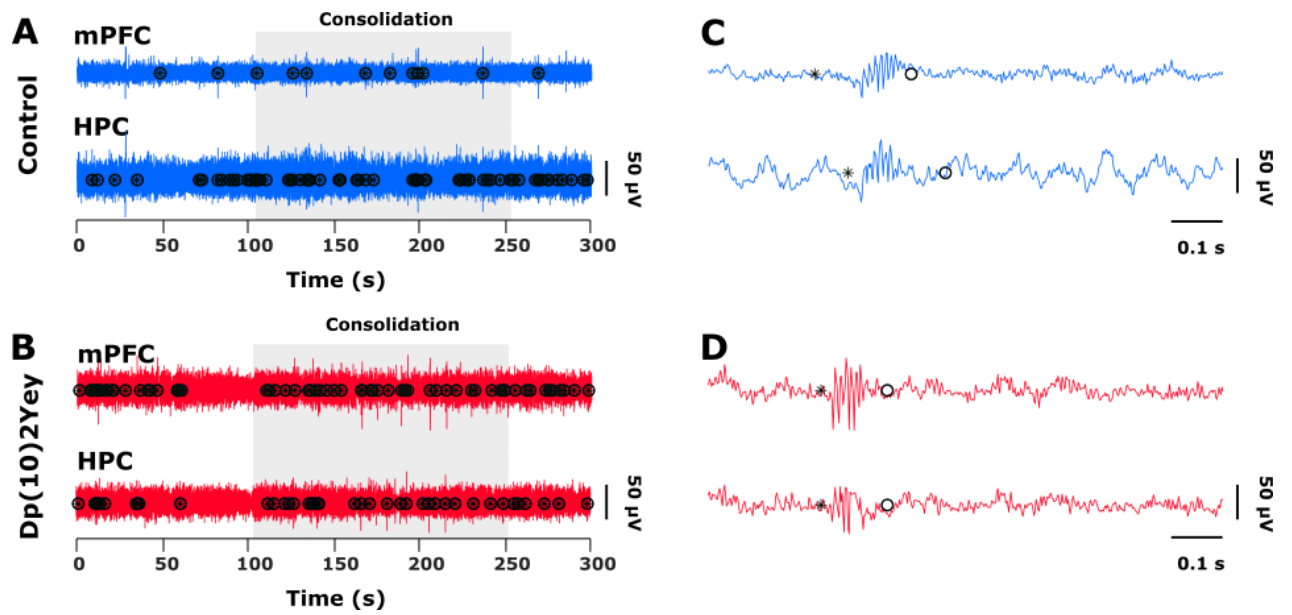

**Figure S1:** Representative traces of local field potential (LFP). **Related to figure 1.** LFP recorded from mPFC and HPC of wild-type littermates **(A)** and Dp(10)2Yey mice **(B)** during the spontaneous alternation task. The detected SWRs are marked with the symbol \* (start) + o (end). The (C) and (D) show example SWRs at greater time resolution.

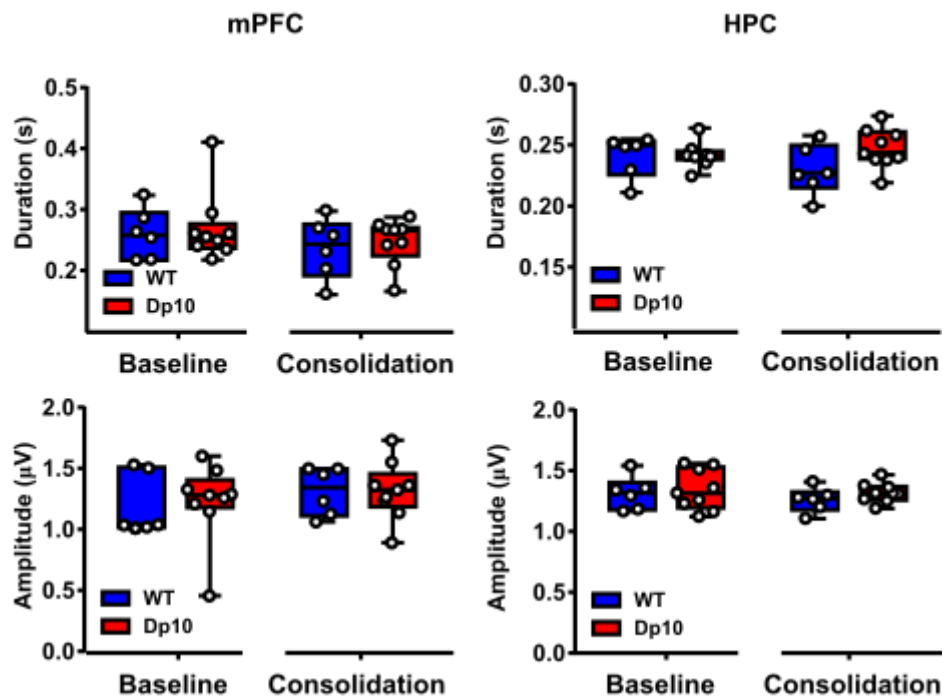

**Figure S2:** Comparison of sharp-wave ripple (SWR) activity in the hippocampus and mPFC between male Dp(10)2Yey mice (**Dp10**, n=9) and wild-type littermates (**WT**, n=6) during the spontaneous alternation task. **Related to figure 1.** Data are presented as box-whisker plots indicating the median, 25-75th percentiles, and minimum-maximum values with data for individual mice superimposed. Statistical comparisons are assessed using a one-way ANOVA with Tukey's multiple comparison test. All statistical details are presented in Data S1.

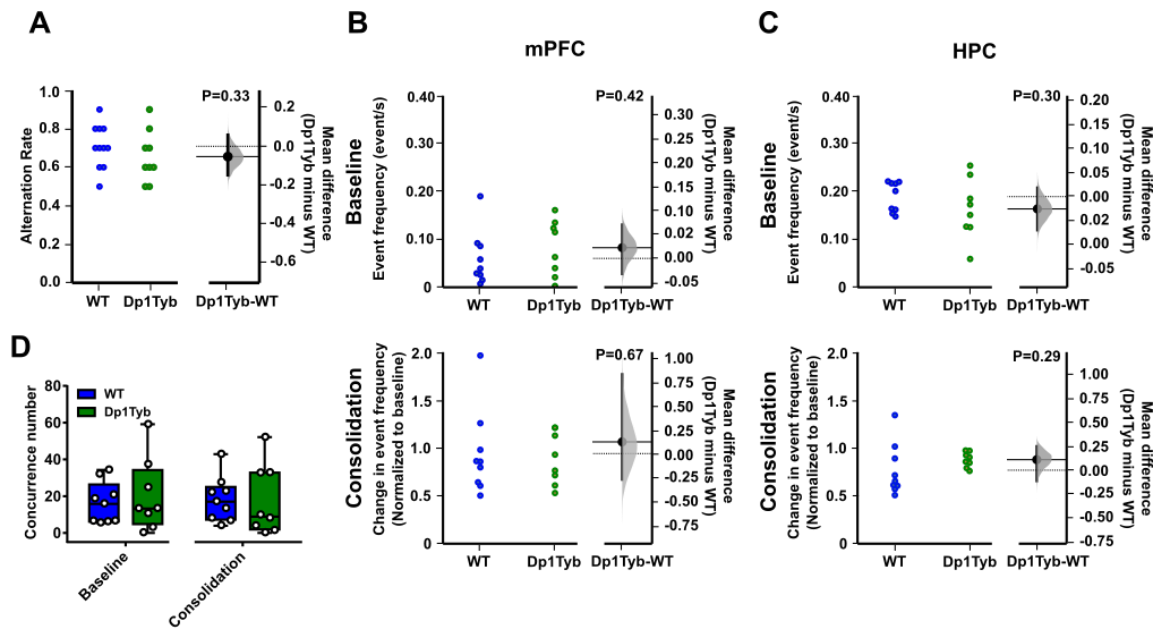

**Figure S3:** Comparison of sharp-wave ripples (SWR) activity in the hippocampus (HPC) and mPFC between male DP1Tyb mice (**Dp1Tyb**) and wild-type littermates (**WT**) during the spontaneous alternation task. **Related to figure 1.** **(A)** Behavioural alternation rates are significantly higher than chance level (0.5) in both WT ( $n=11$ ,  $W=2.83$ ,  $p=0.005$ ) and Dp1Tyb ( $n=9$ ,  $W=2.38$ ,  $p=0.017$ ) animals. **(B, C)** Comparison of SWR event incidence rates in mPFC and HPC during baseline and consolidation periods between WT ( $n=9$ ) and Dp1Tyb ( $n=8$ ) mice. **(D)** Concurrence of SWR activity between mPFC and HPC. **(A-C)** show a scatter plot of raw data from individual animals in the left-hand panel, and the distribution of paired mean differences in the Cumming estimation plot on the right. In this panel, mean differences are indicated with a large black dot, and 95% confidence intervals are indicated by the ends of the vertical error bars. Statistical analysis was performed using a permutation t-test (with 5000 shuffles). **(D)** shows box-whisker plots indicating the median, 25-75th percentiles, and minimum-maximum values with data for individual mice superimposed. All statistical details are presented in Data S1.

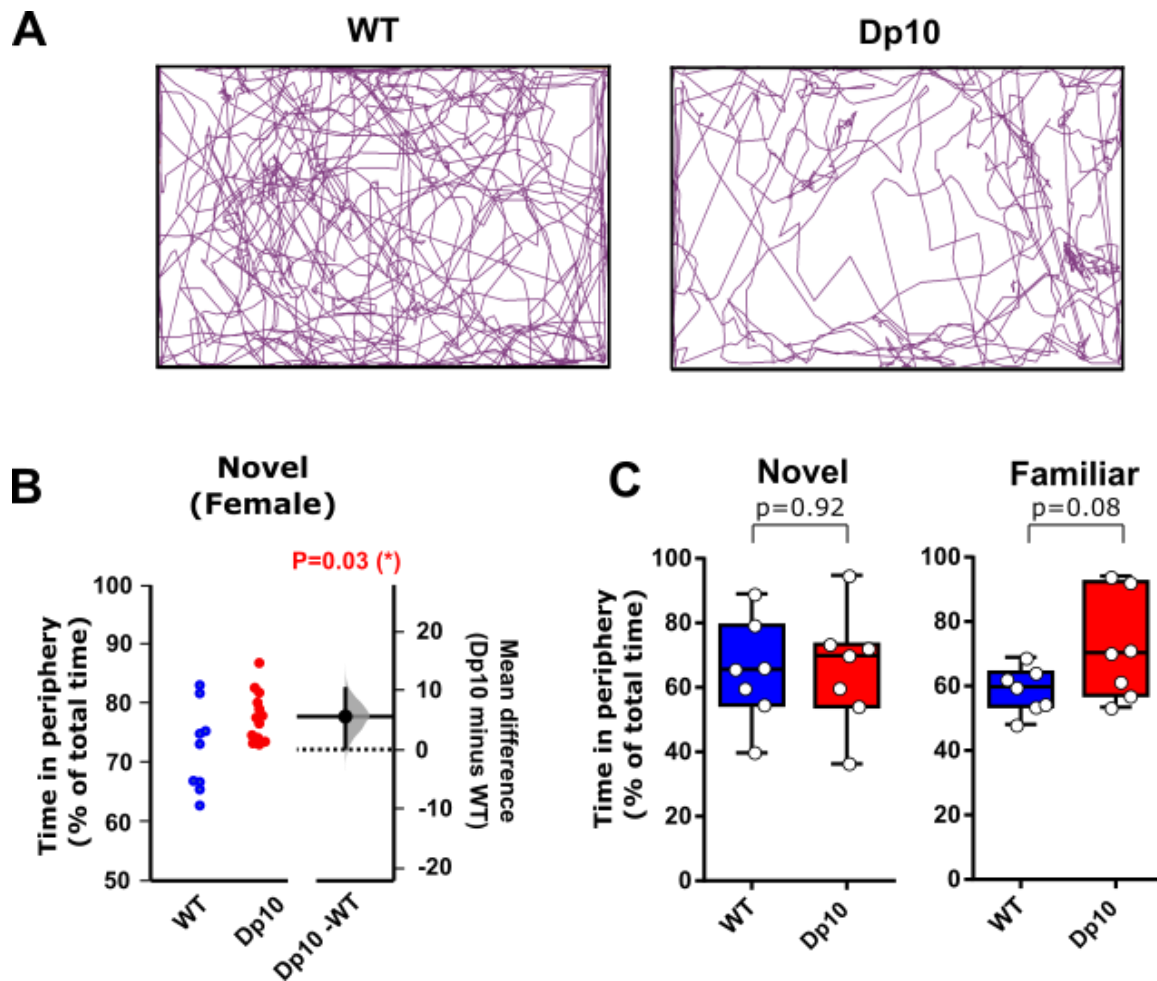

**Figure S4:** Comparison of behaviour between Dp(10)2Yey (**Dp10**) and wild-type littermates (**WT**) during exploration of an open field environment. **Related to figure 2.** **(A)** Representative movement paths in a novel open field environment. **(B)** Female Dp(10)2Yey DS mice (n=13) show anxiety-like behaviour in the novel open field environment, manifesting as more time spent in the periphery of the environment than female WT mice (n=9). **(C)** Conversely, male Dp(10)2Yey DS mice (n=7) do not spend more time in the periphery of either novel or familiar environments than male WT mice (n=7). For **(B)**, the mean difference between groups is shown in the accompanying Gardner-Altman estimation plot. Both groups are plotted on the left axis; the mean difference is plotted on a floating axis on the right as a bootstrap sampling distribution. The mean difference is depicted as a dot; the 95% confidence interval is indicated by the limits of the vertical error bar. Statistical analysis was performed using a permutation t-test (with 5000 shuffles). For **(C)**, the data are presented as box-whisker plots indicating the median, 25-75th percentiles, and minimum-maximum values with data for individual mice superimposed. Statistical comparisons are assessed using a one-way ANOVA with Tukey's multiple comparison test. All statistical details are presented in Data S1.

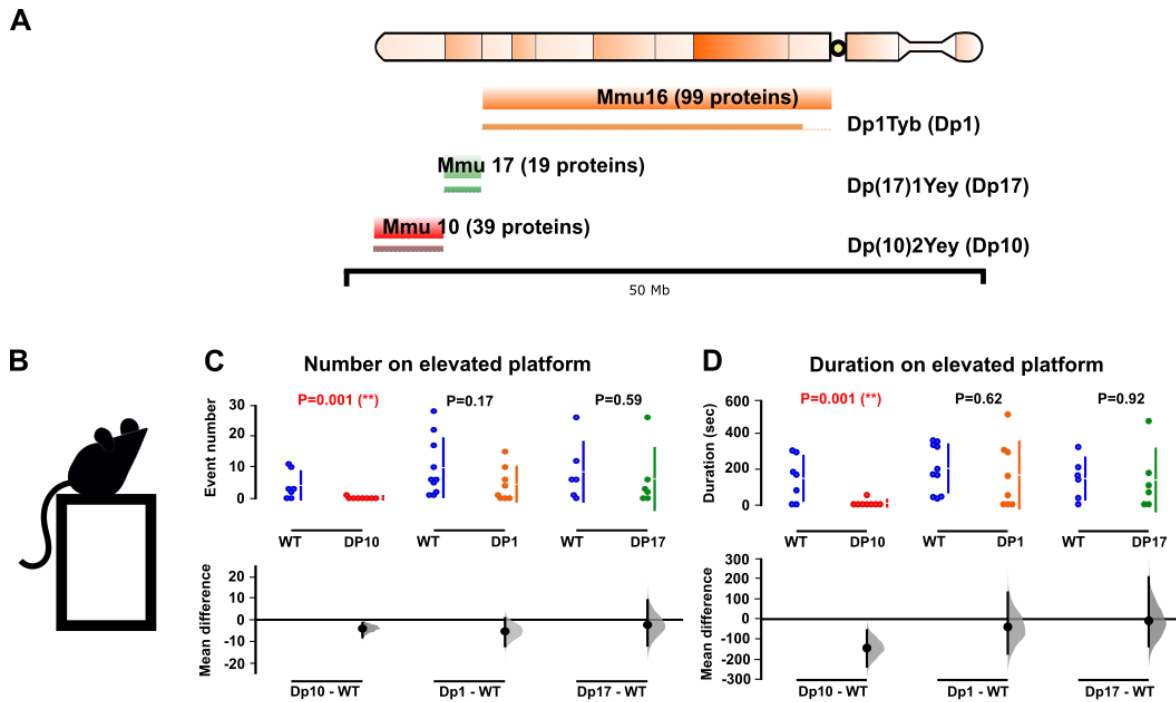

**Figure S5:** Comparison of behaviour between Dp(10)2Yey (**Dp10**, n=8), Dp1Tyb (**Dp1**, n=8), Dp(17)3Yey (**Dp17**, n=6) and wild-type littermates (**WT**; n=7, n=10 and n=6, respectively) during the elevated-platform test. **Related to figure 2. (A)** Schematic illustration of the different mouse models of Down syndrome used in this test. **(B)** Schematic diagram of the elevated platform test. **(C)** Number of climbing bouts onto the elevated platform for each group. This shows that Dp(10)2Yey mice undertook fewer climb events to the elevated platform compared to WT. **(D)** Duration of time spent on the elevated platform by each group. This shows that Dp(10)2Yey mice spent less time on the elevated platform compared to WT. The paired mean differences for comparison are shown in the Cumming estimation plots below. Each paired mean difference is plotted as a bootstrap sampling distribution. Mean differences are depicted as dots; 95% confidence intervals are indicated by the limits of the vertical error bars. Statistical analysis was performed using the permutation t-test (with 5000 shuffles). All statistical details are presented in Data S1.

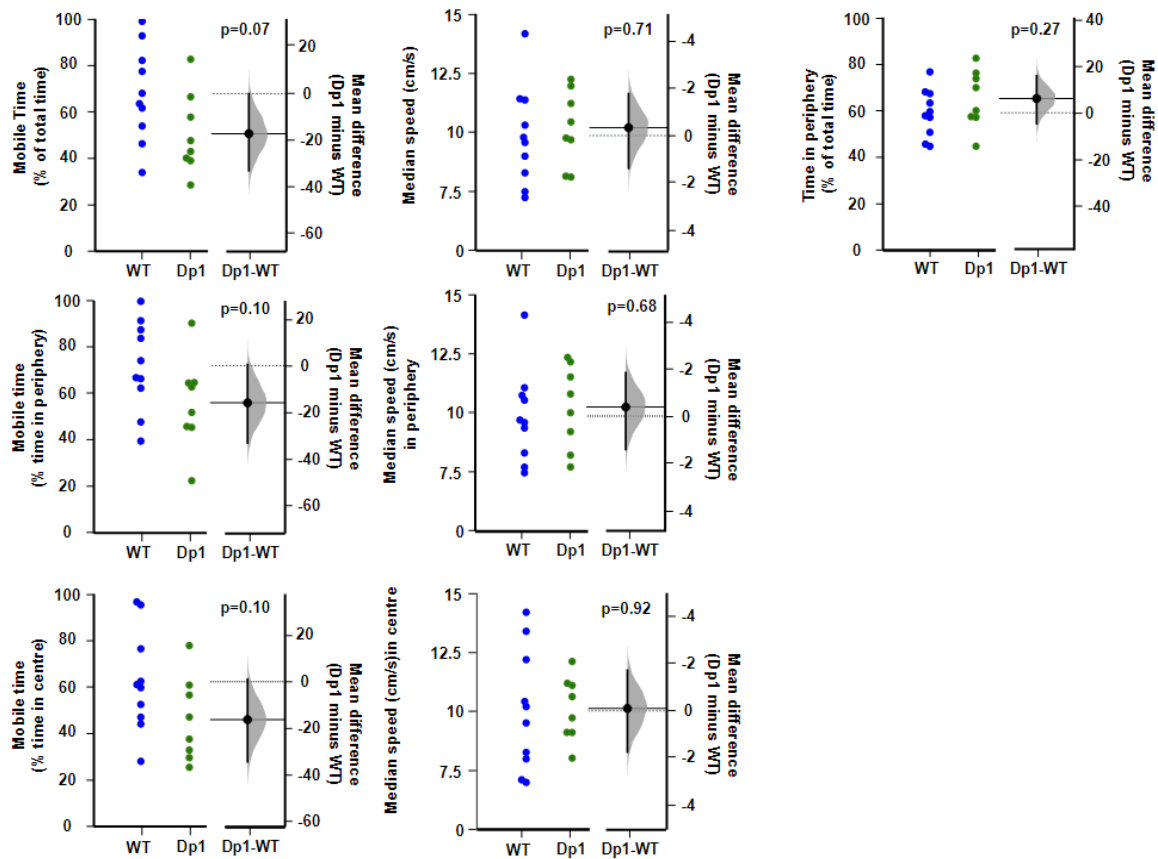

**Figure S6:** Comparison of behaviour between Dp(1)Tyb (Dp1, n=8) and wild-type littermates (WT, n=10) during exploration of a novel environment. **Related to figure 2.** Left panel shows a scatter plot of raw data from individual animals; right panel shows the bootstrap sampling distribution of paired mean differences in Gardner-Altman estimation plots. The mean differences are depicted as black dots and the black line shows the 95% confidence interval. Statistical analysis was performed using a permutation test (with 5000 shuffles). All statistical details are presented in Data S1.

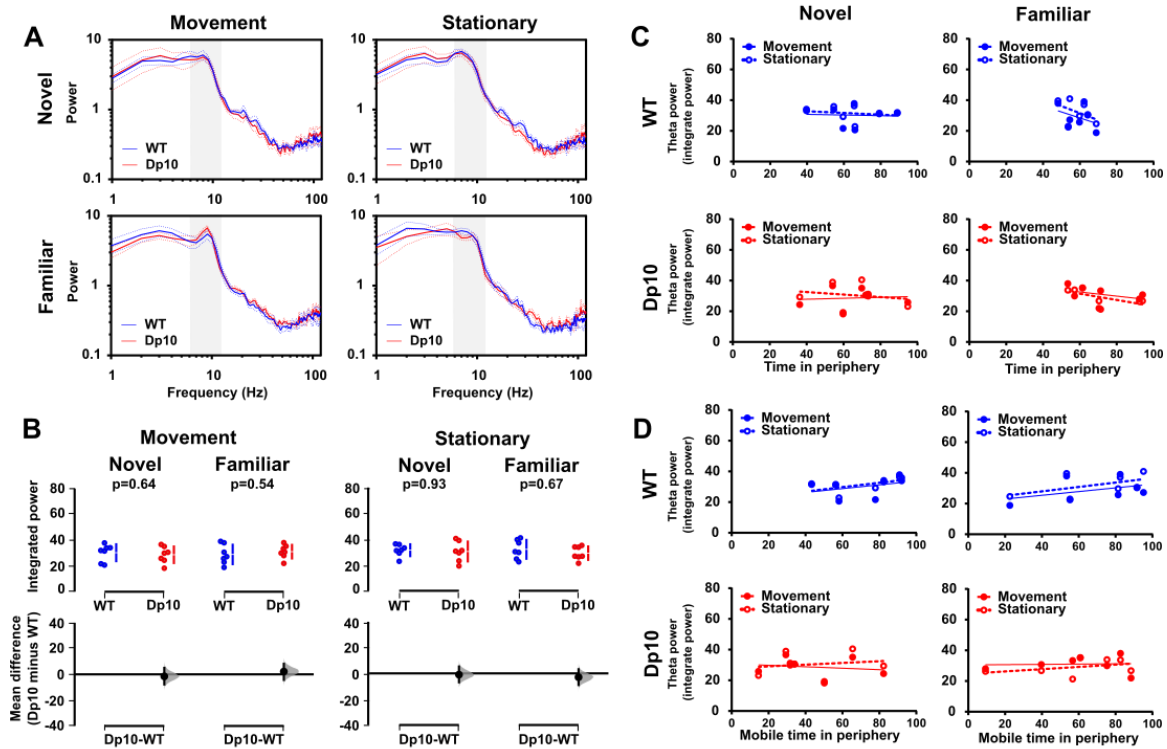

**Figure S7:** Comparison of mPFC theta power between male Dp(10)2Yey (**Dp10**,  $n=7$ ) and wild-type littermates (**WT**,  $n=7$ ) during exploration of an open field environment. **Related to figure 3.** **(A)** mPFC power spectra for novel and familiar open field environments. Data are presented as mean  $\pm$  SEM. **(B)** Comparison of integrated theta power during movement and stationary periods between Dp10 and WT mice in novel and familiar open field environments. The paired mean differences for comparisons are shown in the Cumming estimation plots below. Each paired mean difference is plotted as a bootstrap sampling distribution. Mean differences are depicted as dots; 95% confidence intervals are indicated by the limits of the vertical error bars. Statistical analysis was performed using the permutation t-test (with 5000 shuffles). **(C)** Relationship between integrated theta power and total percentage of time spent in the periphery. Continuous line shows the linear regression. **(D)** Relationship between integrated theta power and percentage of time spent mobile while in the periphery. Continuous line shows the linear regression. Pearson correlation coefficients ( $R$ ) and significance ( $p$  values) for **(C, D)** are presented in Supplementary Table 1. All statistical details are presented in Data S1.



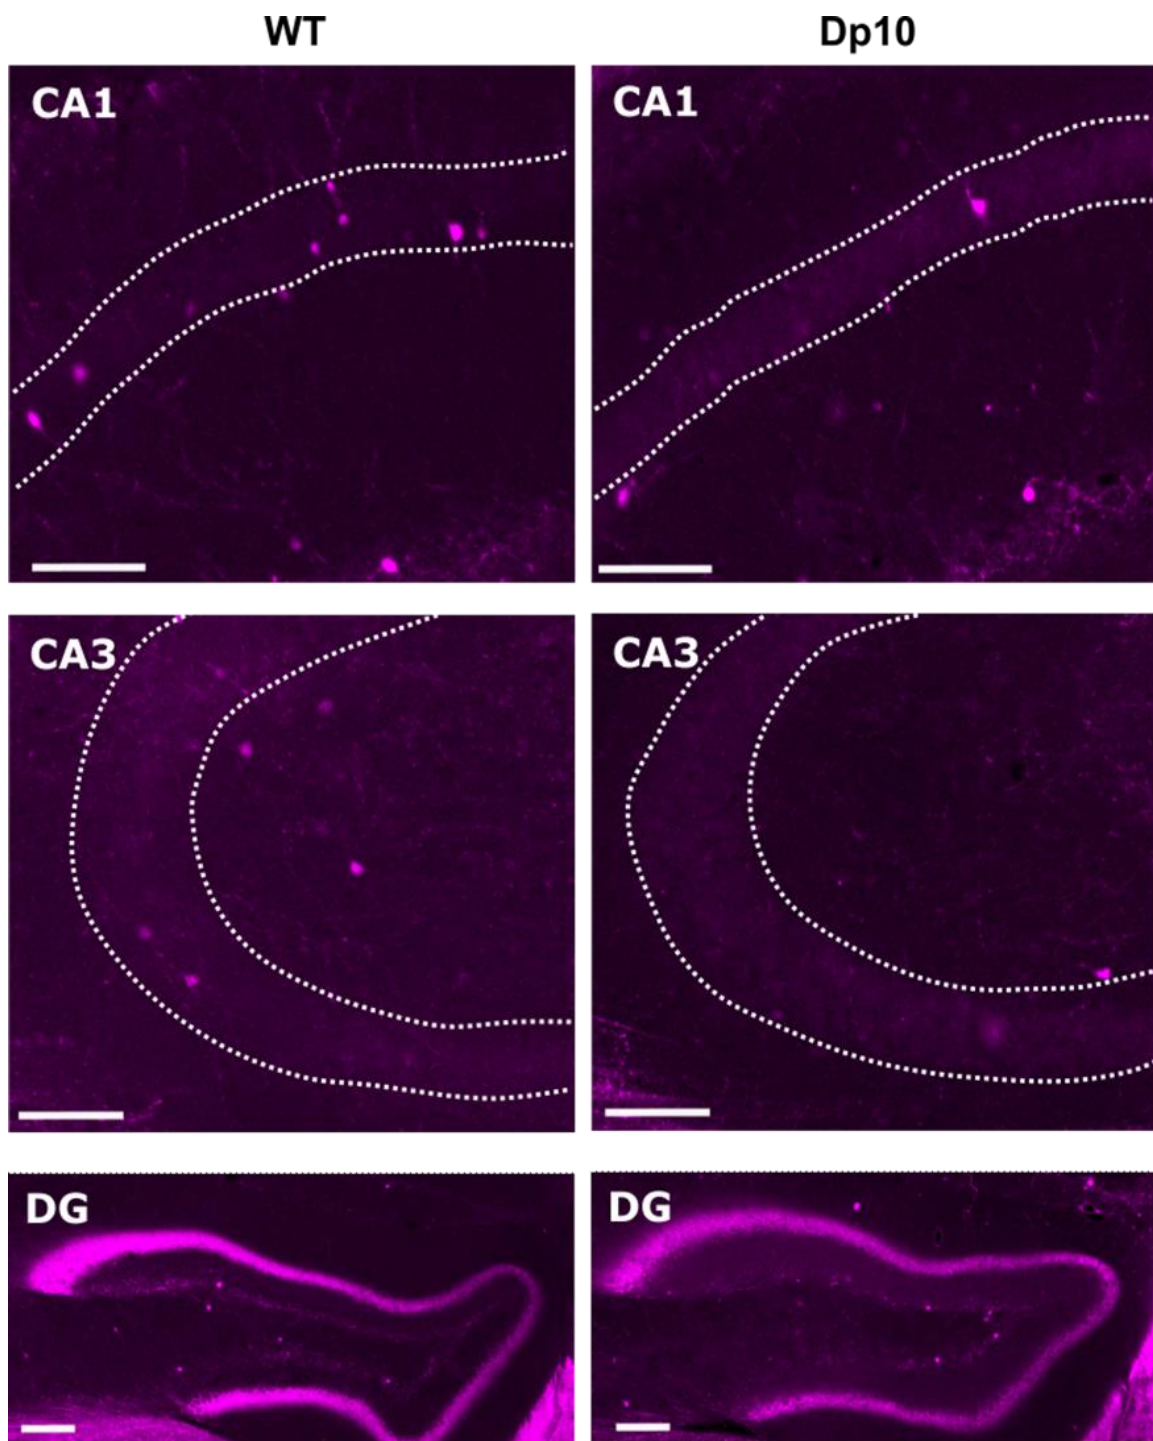

**Figure S8:** Example of Immunohistochemical staining of CR- expressing interneurons in hippocampal areas CA1, CA3, and DG. **Related to figure 5.** Scare bar indicates 100  $\mu$ m.

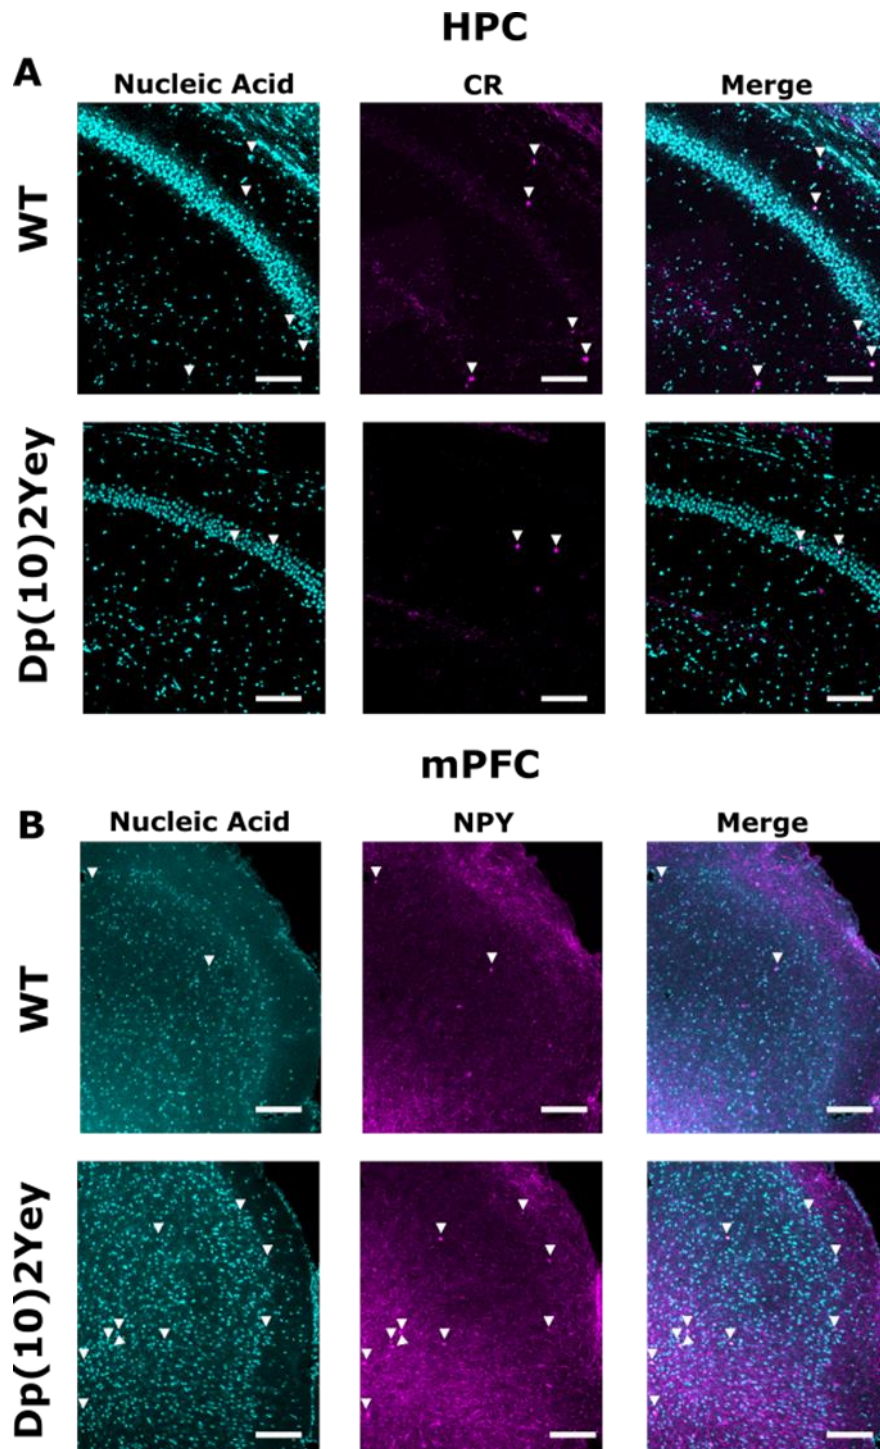

**Figure S9:** Example of immunofluorescence images of calretinin (CR)-expressing interneurons in hippocampal areas CA1, and Neuropeptide Y (NPY)- expressing interneurons in mPFC. **Related to figure 5.** SYTOX dye were used to stain nuclei acid in fixed tissue material. White arrowheads indicate overlap of cell marker and nuclear stain in the **(A)** HPC CA1 area and **(B)** mPFC area. Scare bar indicates 100  $\mu$ m. These 2D images were taken using a 10x dry microscope Objective Lens.

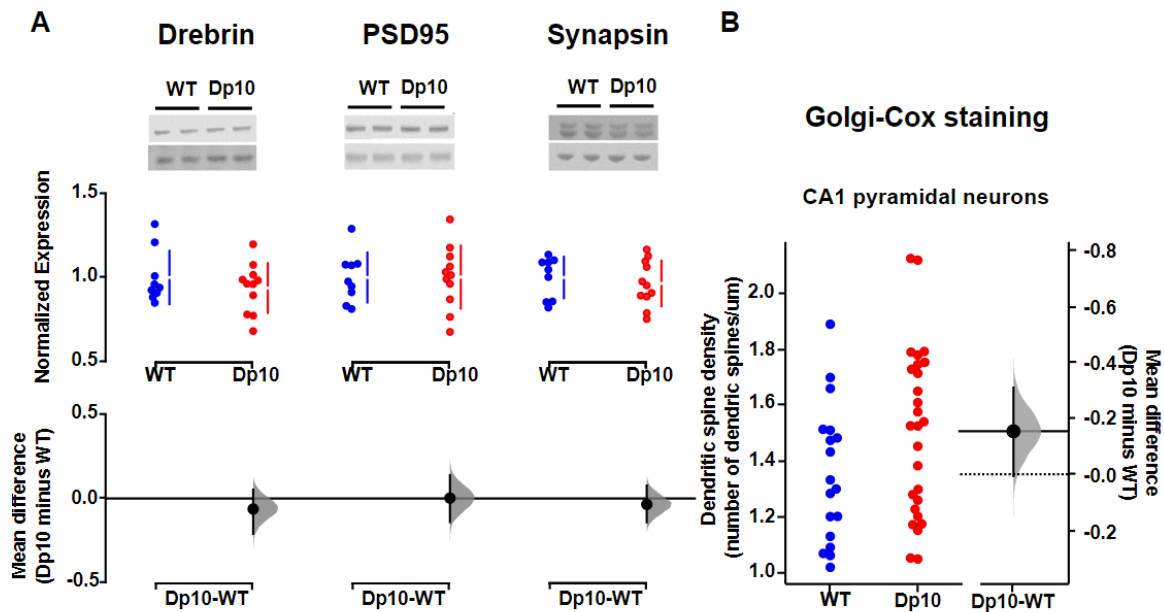

**Figure S10:** Comparison of dendritic spine morphology and basal synaptic plasticity between male Dp(10)2Yey DS mice (**Dp10**) and their wild-type littermates (**WT**). **Related to figure 5.** **(A)** The synaptic markers Drebrin, Synapsin, and PSD95 were used to quantify the expression of synaptic connections in Dp(10)2Yey ( $n=11$ ) and WT ( $n=9$ ) mice. The paired mean differences for comparisons are shown in the Cumming estimation plots below. Each paired mean difference is plotted as a bootstrap sampling distribution. Mean differences are depicted as dots; 95% confidence intervals are indicated by the limits of the vertical error bars. Statistical analysis was performed using the permutation t-test (with 5000 shuffles). **(B)** Golgi-Cox staining was used to visualize and compare the dendritic branching pattern and dendritic spine density of hippocampal CA1 pyramidal neurons between Dp(10)2Yey ( $n=27$ ) and WT ( $n=18$ ) mice. The paired mean differences for comparisons are shown in the Gardner-Altman estimation plot. Both groups are plotted on the left axis; the mean difference is plotted on a floating axis on the right as a bootstrap sampling distribution. The mean difference is depicted as a dot; the 95% confidence interval is indicated by the limits of the vertical error bar. Statistical analysis was performed using the permutation t-test (with 5000 shuffles). All statistical details are presented in Data S1.

**A**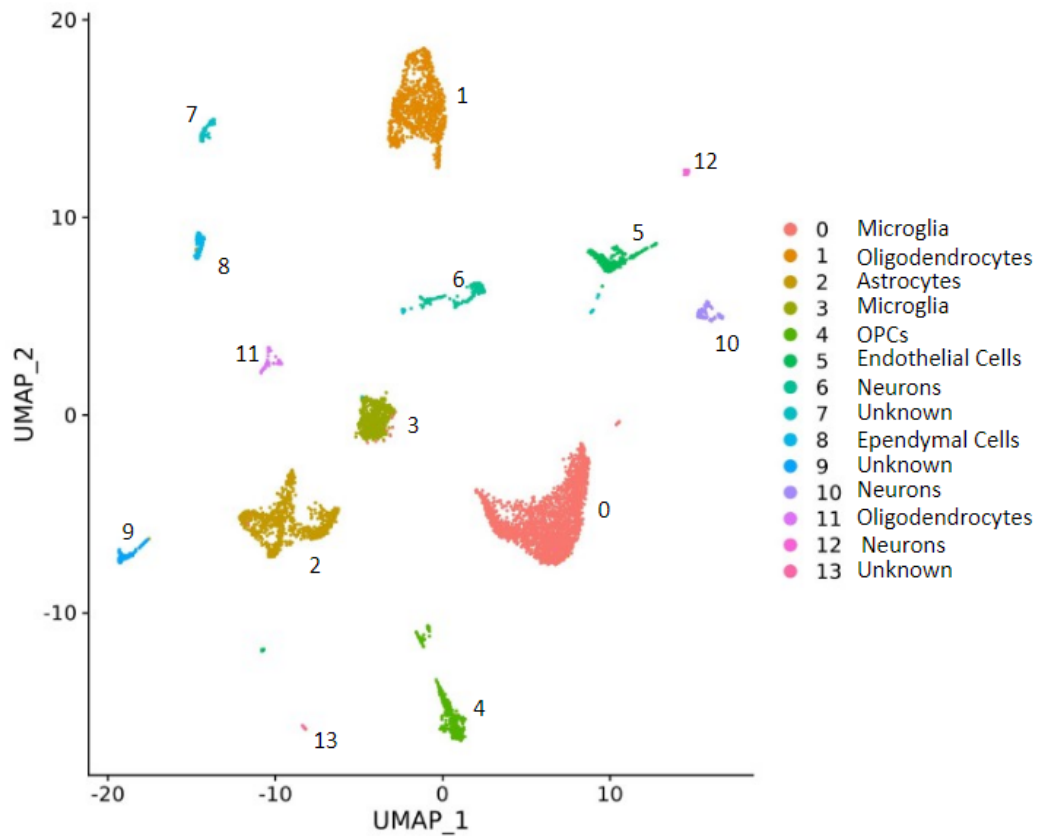**B**

| Cluster # | Cell Type                      | Cluster Markers                                                   | No. of Cells |      | Total No. of Cells | No. of DEGs<br>(adjpval<0.01) |
|-----------|--------------------------------|-------------------------------------------------------------------|--------------|------|--------------------|-------------------------------|
|           |                                |                                                                   | Dp(10)2Yey   | WT   |                    |                               |
| 0         | Microglia                      | Tmem119, Fosb, Rgs2, Klf4, Klf6, Ctss, C1qb, Hexb, C1qc, C1qa     | 1162         | 852  | 2014               | 576                           |
| 1         | Oligodendrocyte                | Olig2, Olig1, Mbp, Mog, Sox10, Ermn, Plp1, Mal, Opalin, Trf, Mobp | 529          | 440  | 969                | 99                            |
| 2         | Astrocytes                     | Gfap, Slc1a2, Slc1a3, Gja1, S100b, Aldoc, Clu, Cpe                | 543          | 346  | 889                | 205                           |
| 3         | Microglia                      | Ctss, C1qb, Hexb, C1qc, C1qa                                      | 317          | 241  | 558                | 9                             |
| 4         | Oligodendrocyte Precursor Cell | Pdgfra, Cacng4, Marcks, Olig1, Cspg4                              | 219          | 163  | 382                | 141                           |
| 5         | Endothelial Cell               | Bsg, Ly6c1, Igfbp7, Flt1, Ly6a                                    | 145          | 137  | 282                | 749                           |
| 6         | Neurons                        | Rtn1, Calm2, Tubb3                                                | 111          | 77   | 188                | 37                            |
| 7         | Unknown                        |                                                                   | 83           | 50   | 133                | 4                             |
| 8         | Ependymal Cell                 | Calm4, Ak7, Ccdc153, 1110017D15Rik, DynlRb2                       | 52           | 76   | 128                | 451                           |
| 9         | Unknown                        |                                                                   | 74           | 51   | 125                | 1                             |
| 10        | Neurons                        | Atp1b1, Olfm1, Rtn1, Snap25, Calm2, Cck, Syp, Vamp2               | 54           | 65   | 119                | 0                             |
| 11        | Oligodendrocytes               | Vcan, Cacng4, Marcks, Olig1, Plp1, Mbp                            | 43           | 34   | 77                 | 16                            |
| 12        | Neurons                        | Cck, Tubb3, Syp, Vamp2                                            | 26           | 25   | 51                 | 1                             |
| 13        | Unknown                        |                                                                   | 8            | 14   | 22                 | 47                            |
| Totals:   |                                |                                                                   | 3366         | 2571 | 5937               | 2336                          |

**Figure S11: Characterization of hippocampal cell clusters from Dp(10)2Yey DS mice. Related to STAR Methods, result session: Single-cell RNA sequencing of Dp(10)2Yey Hippocampus, and discussion.** A total of 5937 cells were sequenced from two experiments (Dp(10)2Yey, n=2; WT, n=2). t-SNE analysis was used to define cell clusters and UMAP to visualise them. 14 cell clusters were defined, 11 of which were identified by known markers of microglia, oligodendrocytes, astrocytes, oligodendrocyte precursor cells (OPCs), endothelial cells, neurons, and ependymal cells.

**Table S1:** Pearson's R and P-values for the correlations between integrated theta power and behavioural performance. **Related to figures 3 and 4.**

| <b>Integrated theta power</b>                                                       |                               |                               |                               |                               |
|-------------------------------------------------------------------------------------|-------------------------------|-------------------------------|-------------------------------|-------------------------------|
|                                                                                     | <b>Novel</b>                  |                               | <b>Familiar</b>               |                               |
| WT                                                                                  | Time in the periphery         | Mobile time in the periphery  | Time in the periphery         | Mobile time in the periphery  |
| Movement                                                                            | R <sup>2</sup> =0.85; p=0.003 | R <sup>2</sup> =0.72; p=0.015 | R <sup>2</sup> =0.25; p=0.254 | R <sup>2</sup> =0.43; p=0.110 |
| Stationary                                                                          | R <sup>2</sup> =0.76; p=0.010 | R <sup>2</sup> =0.68; p=0.021 | R <sup>2</sup> =0.23; p=0.235 | R <sup>2</sup> =0.23; p=0.270 |
| Dp(10)2Ye<br>y                                                                      |                               |                               |                               |                               |
| Movement                                                                            | R <sup>2</sup> =0.43; p=0.112 | R <sup>2</sup> =0.87; p=0.002 | R <sup>2</sup> =0.05; p=0.62  | R <sup>2</sup> =0.01; p=0.808 |
| Stationary                                                                          | R <sup>2</sup> =0.28; p=0.224 | R <sup>2</sup> =0.72; p=0.016 | R <sup>2</sup> =0.16; p=0.37  | R <sup>2</sup> =0.10; p=0.488 |
| <b>Phase-amplitude coupling (6–12-Hz theta phase and 60–120-Hz gamma amplitude)</b> |                               |                               |                               |                               |
|                                                                                     | <b>Novel</b>                  |                               | <b>Familiar</b>               |                               |
| WT                                                                                  | Time in the periphery         | Mobile time in the periphery  | Time in the periphery         | Mobile time in the periphery  |
| Movement                                                                            | R <sup>2</sup> =0.87; p=0.048 | R <sup>2</sup> =0.66; p=0.027 | R <sup>2</sup> =0.08; p=0.536 | R <sup>2</sup> =0.24; p=0.269 |
| Stationary                                                                          | R <sup>2</sup> =0.46; p=0.089 | R <sup>2</sup> =0.67; p=0.024 | R <sup>2</sup> =0.13; p=0.415 | R <sup>2</sup> =0.08; p=0.531 |
| Dp(10)2Ye<br>y                                                                      |                               |                               |                               |                               |
| Movement                                                                            | R <sup>2</sup> =0.34; p=0.173 | R <sup>2</sup> =0.76; p=0.010 | R <sup>2</sup> =0.31; p=0.196 | R <sup>2</sup> =0.16; p=0.370 |
| Stationary                                                                          | R <sup>2</sup> =0.04; p=0.663 | R <sup>2</sup> =0.16; p=0.369 | R <sup>2</sup> =0.57; p=0.050 | R <sup>2</sup> =0.28; p=0.222 |

**Table S2:** Comparing the cell density of Parvalbumin (PV) and neuropeptide Y (NPY) expressing interneurons in the hippocampus and the cell density of PV and calretinin (CR) - expressing interneurons in mPFC between Dp1Tyb DS mice and wild-type littermate controls. **Related to figures 5 and 6.** The effect sizes (mean difference) and CIs (95% confidence: lower limit and upper limit) are reported in this table. The p value(s) reported are the likelihood(s) of observing the effect size(s) if the null hypothesis of zero difference is true. For each permutation P value, 5000 shuffles of the control and test labels were performed. (DG= dentate gyrus, ACC= anterior cingulate cortex, IL= infralimbic area, PL= perlimbic area).

| <b>Hippocampus</b>                 |                  |               |                 |                |                |                     |
|------------------------------------|------------------|---------------|-----------------|----------------|----------------|---------------------|
| <b>PV-expressing interneurons</b>  | N for Dp(10)2Yey | N for control | Mean difference | CI_lower_limit | CI_upper_limit | P value permutation |
| Hippocampus -all                   | 3                | 3             | 11.31           | -298.84        | 223.11         | 0.89                |
| CA1                                | 3                | 3             | -285.26         | -1144.07       | 237.61         | 0.68                |
| CA2                                | 3                | 3             | -360.70         | -1024.05       | 302.64         | 0.39                |
| CA3                                | 3                | 3             | 30.33           | -404.28        | 357.24         | 0.89                |
| DG-molecular layer                 | 3                | 3             | -16.24          | -149.78        | 73.40          | 0.94                |
| DG-granule cell layer              | 3                | 3             | 289.72          | -881.24        | 1315.85        | 0.63                |
| DG-polymorphic layer               | 3                | 3             | 119.62          | -390.23        | 578.90         | 0.60                |
| Fasciola cinerea                   | 3                | 3             | 301.69          | -174.08        | 961.41         | 0.48                |
| <b>NPY-expressing interneurons</b> | N for Dp(10)2Yey | N for control | Mean difference | CI_lower_limit | CI_upper_limit | P value permutation |
| Hippocampus -all                   | 3                | 3             | 258.06          | -358.19        | 690.91         | 0.49                |
| CA1                                | 3                | 3             | 55.3            | -163.57        | 304.30         | 0.70                |
| CA2                                | 3                | 3             | -110.62         | -372.87        | 76.46          | 0.53                |
| CA3                                | 3                | 3             | 29.81           | -169.03        | 284.91         | 0.80                |
| DG-molecular layer                 | 3                | 3             | 408.37          | -132.05        | 803.91         | 0.14                |
| DG-granule cell layer              | 3                | 3             | 692.97          | -180.56        | 1466.24        | 0.20                |
| DG-polymorphic layer               | 3                | 3             | 235.91          | -640.56        | 779.04         | 0.42                |
| Fasciola cinerea                   | 3                | 3             | 494.61          | -1741.85       | 1868.38        | 0.63                |
| <b>mPFC</b>                        |                  |               |                 |                |                |                     |
| <b>PV-expressing interneurons</b>  | N for Dp(10)2Yey | N for control | Mean difference | CI_lower_limit | CI_upper_limit | P value permutation |
| mPFC-all                           | 3                | 3             | -247.99         | -1100.33       | 628.19         | 0.60                |
| ACC                                | 3                | 3             | -303.25         | -1913.15       | 1306.65        | 0.49                |
| IR                                 | 3                | 3             | -125.68         | -640.84        | 562.96         | 0.70                |
| PL                                 | 3                | 3             | -315.04         | -1458.85       | 828.76         | 0.40                |
| <b>CR-expressing interneurons</b>  | N for Dp(10)2Yey | N for control | Mean difference | CI_lower_limit | CI_upper_limit | P value permutation |

|                                   |                  |               |                 |                |                |                     |
|-----------------------------------|------------------|---------------|-----------------|----------------|----------------|---------------------|
| mPFC-all                          | 3                | 4             | 266.46          | -170.15        | 698.29         | 0.38                |
| ACC                               | 3                | 4             | 29.52           | -563.32        | 408.89         | 0.94                |
| IR                                | 3                | 4             | 742.52          | 107.02         | 1320.30        | 0.08                |
| PL                                | 3                | 4             | 27.33           | -465.48        | 482.83         | 0.91                |
| <b>Hippocampus</b>                |                  |               |                 |                |                |                     |
| <b>PV-expressing interneurons</b> | N for Dp(10)2Yey | N for control | Mean difference | CI_lower_limit | CI_upper limit | P value permutation |
| Hippocampus -all                  | 3                | 3             | 11.31           | -298.84        | 223.11         | 0.89                |
| CA1                               | 3                | 3             | -285.26         | -1144.07       | 237.61         | 0.68                |
| CA2                               | 3                | 3             | -360.70         | -1024.05       | 302.64         | 0.39                |
| CA3                               | 3                | 3             | 30.33           | -404.28        | 357.24         | 0.89                |
| DG-molecular layer                | 3                | 3             | -16.24          | -149.78        | 73.40          | 0.94                |
| DG-granule cell layer             | 3                | 3             | 289.72          | -881.24        | 1315.85        | 0.63                |
| DG-polymorphic layer              | 3                | 3             | 119.62          | -390.23        | 578.90         | 0.60                |
| Fasciola cinerea                  | 3                | 3             | 301.69          | -174.08        | 961.41         | 0.48                |
| <b>mPFC</b>                       |                  |               |                 |                |                |                     |
| <b>PV-expressing interneurons</b> | N for Dp(10)2Yey | N for control | Mean difference | CI_lower_limit | CI_upper limit | P value permutation |
| mPFC-all                          | 3                | 3             | -247.99         | -1100.33       | 628.19         | 0.60                |
| ACC                               | 3                | 3             | -303.25         | -1913.15       | 1306.65        | 0.49                |
| IR                                | 3                | 3             | -125.68         | -640.84        | 562.96         | 0.70                |
| PL                                | 3                | 3             | -315.04         | -1458.85       | 828.76         | 0.40                |
| <b>CR-expressing interneurons</b> | N for Dp(10)2Yey | N for control | Mean difference | CI_lower_limit | CI_upper limit | P value permutation |
| mPFC-all                          | 3                | 4             | 266.46          | -170.15        | 698.29         | 0.38                |
| ACC                               | 3                | 4             | 29.52           | -563.32        | 408.89         | 0.94                |
| IR                                | 3                | 4             | 742.52          | 107.02         | 1320.30        | 0.08                |
| PL                                | 3                | 4             | 27.33           | -465.48        | 482.83         | 0.91                |



**Table S3:** GSEA of Pathways Significantly Upregulated in male Dp(10)2Yey HPC. **Related to STAR Methods, result session: Single-cell RNA sequencing of Dp(10)2Yey Hippocampus, and discussion.** Gene Set Enrichment Analysis (GSEA) was used to determine whether a defined set of genes showed statistically significant concordant differences between Dp(10)2Yey and WT cells. In total 60 Hallmark pathways were upregulated in the Dp(10)2Yey cells compared to WT cells (FWER < 0.05). <sup>1</sup>NES is calculated as described in Methods. <sup>2</sup>adjusted p value is the significance of pathway enrichment as described in Methods, pathways are ordered by NES.

| Cell Cluster | Cell Cluster ID  | Hallmark Pathway                           | NES <sup>1</sup> | adjusted p-value <sup>2</sup> |
|--------------|------------------|--------------------------------------------|------------------|-------------------------------|
| 0            | Microglia        | HALLMARK COAGULATION                       | 1.92             | 0.006                         |
|              |                  | HALLMARK EPITHELIAL MESENCHYMAL TRANSITION | 1.77             | 0.006                         |
|              |                  | HALLMARK COMPLEMENT                        | 1.73             | 0.006                         |
|              |                  | HALLMARK MYOGENESIS                        | 1.69             | 0.006                         |
|              |                  | HALLMARK TNFA SIGNALING VIA NFKB           | 1.69             | 0.006                         |
|              |                  | HALLMARK ALLOGRAFT REJECTION               | 1.61             | 0.006                         |
|              |                  | HALLMARK P53 PATHWAY                       | 1.52             | 0.006                         |
|              |                  | HALLMARK APOPTOSIS                         | 1.50             | 0.011                         |
|              |                  | HALLMARK UV RESPONSE UP                    | 1.50             | 0.010                         |
|              |                  | HALLMARK INTERFERON GAMMA RESPONSE         | 1.44             | 0.011                         |
|              |                  | HALLMARK MTORC1 SIGNALING                  | 1.43             | 0.010                         |
|              |                  | HALLMARK HYPOXIA                           | 1.40             | 0.032                         |
|              |                  | HALLMARK APICAL JUNCTION                   | 1.39             | 0.045                         |
|              |                  | HALLMARK MYC TARGETS V1                    | 1.39             | 0.011                         |
|              |                  | HALLMARK OXIDATIVE PHOSPHORYLATION         | 1.32             | 0.021                         |
| 1            | Oligodendrocytes | HALLMARK MYOGENESIS                        | 1.49             | 0.011                         |
|              |                  | HALLMARK COMPLEMENT                        | 1.45             | 0.011                         |
|              |                  | HALLMARK ADIPOGENESIS                      | 1.40             | 0.011                         |
|              |                  | HALLMARK OXIDATIVE PHOSPHORYLATION         | 1.39             | 0.011                         |
|              |                  | HALLMARK UV RESPONSE UP                    | 1.37             | 0.025                         |
|              |                  | HALLMARK APOPTOSIS                         | 1.35             | 0.033                         |
|              |                  | HALLMARK MTORC1 SIGNALING                  | 1.30             | 0.025                         |
|              |                  | HALLMARK MYC TARGETS V1                    | 1.26             | 0.025                         |
| 2            | Astrocytes       | HALLMARK COMPLEMENT                        | 1.93             | 0.020                         |
| 3            | Microglia        | HALLMARK OXIDATIVE PHOSPHORYLATION         | 2.37             | 0.043                         |
|              |                  | HALLMARK COMPLEMENT                        | 1.87             | 0.043                         |
|              |                  | HALLMARK ADIPOGENESIS                      | 1.74             | 0.043                         |
| 4            | OPCs             | HALLMARK COAGULATION                       | 1.71             | 0.016                         |
|              |                  | HALLMARK OXIDATIVE PHOSPHORYLATION         | 1.70             | 0.016                         |
|              |                  | HALLMARK MYC TARGETS V1                    | 1.60             | 0.016                         |
|              |                  | HALLMARK EPITHELIAL MESENCHYMAL TRANSITION | 1.46             | 0.034                         |
|              |                  | HALLMARK G2M CHECKPOINT                    | 1.40             | 0.034                         |



|    |                   |                                            |      |       |
|----|-------------------|--------------------------------------------|------|-------|
|    |                   | HALLMARK UV RESPONSE UP                    | 1.39 | 0.034 |
|    |                   | HALLMARK ADIPOGENESIS                      | 1.34 | 0.034 |
| 5  | Endothelial Cells | HALLMARK COMPLEMENT                        | 2.05 | 0.004 |
|    |                   | HALLMARK COAGULATION                       | 2.04 | 0.004 |
|    |                   | HALLMARK TNFA SIGNALING VIA NFKB           | 2.01 | 0.004 |
|    |                   | HALLMARK ALLOGRAFT REJECTION               | 2.00 | 0.004 |
|    |                   | HALLMARK EPITHELIAL MESENCHYMAL TRANSITION | 1.93 | 0.004 |
|    |                   | HALLMARK UV RESPONSE UP                    | 1.79 | 0.004 |
|    |                   | HALLMARK HYPOXIA                           | 1.75 | 0.004 |
|    |                   | HALLMARK CHOLESTEROL HOMEOSTASIS           | 1.74 | 0.027 |
|    |                   | HALLMARK P53 PATHWAY                       | 1.66 | 0.004 |
|    |                   | HALLMARK MTORC1 SIGNALING                  | 1.61 | 0.004 |
|    |                   | HALLMARK INTERFERON GAMMA RESPONSE         | 1.60 | 0.004 |
|    |                   | HALLMARK APICAL JUNCTION                   | 1.59 | 0.004 |
|    |                   | HALLMARK MYOGENESIS                        | 1.59 | 0.034 |
|    |                   | HALLMARK OXIDATIVE PHOSPHORYLATION         | 1.54 | 0.011 |
|    |                   | HALLMARK KRAS SIGNALING UP                 | 1.50 | 0.034 |
|    |                   | HALLMARK APOPTOSIS                         | 1.49 | 0.027 |
|    |                   | HALLMARK INFLAMMATORY RESPONSE             | 1.48 | 0.027 |
| 6  | Neurons           | HALLMARK COMPLEMENT                        | 1.73 | 0.047 |
|    |                   | HALLMARK REACTIVE OXYGEN SPECIES PATHWAY   | 1.68 | 0.047 |
|    |                   | HALLMARK OXIDATIVE PHOSPHORYLATION         | 1.53 | 0.047 |
| 8  | Ependymal Cells   | HALLMARK OXIDATIVE PHOSPHORYLATION         | 2.31 | 0.022 |
|    |                   | HALLMARK MYC TARGETS V1                    | 2.22 | 0.022 |
|    |                   | HALLMARK ADIPOGENESIS                      | 1.53 | 0.030 |
| 11 | Oligodendrocytes  | HALLMARK OXIDATIVE PHOSPHORYLATION         | 1.87 | 0.036 |
|    |                   | HALLMARK MYC TARGETS V1                    | 1.38 | 0.036 |
| 12 | Neurons           | HALLMARK MYOGENESIS                        | 1.62 | 0.039 |
